# Supplementary material for: Cross-linking of highly methoxylated pectin with copper: the specific anion influence
Source: Royal Society of Chemistry journal article supplement (doi:10.1039/c5nj03320a), 2015-12-11
Supplement: c5nj03320a1.pdf [file c5nj03320a1.pdf]

### Cross-linking of highly methoxylated pectin with copper: The specific anion influence

Sanja Seslija, Djordje Veljovic, Melina Kalagasidis-Krusic, Jasmina Stevanovic, Sava Velickovic and Ivanka Popovic

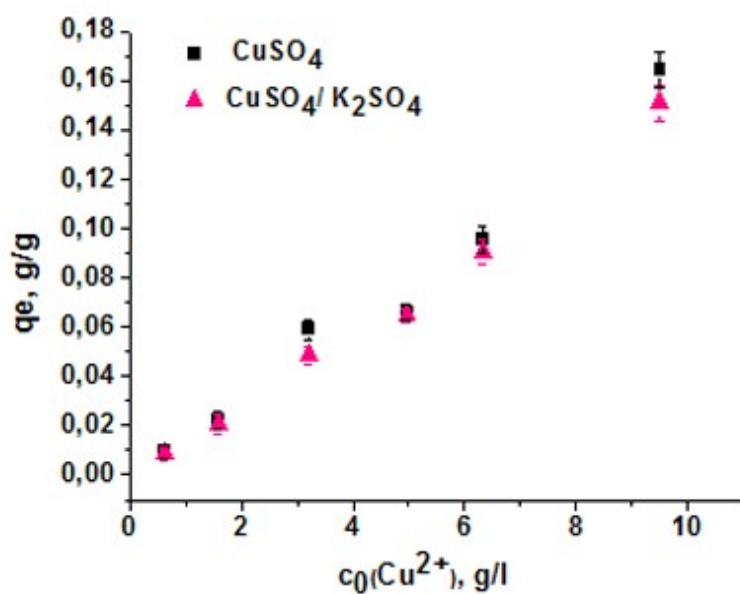

Fig.S1. The comparison of sorption capacities of pectin on the initial concentration of Cu<sup>2+</sup> with and without the addition of equimolar concentrations of K<sub>2</sub>SO<sub>4</sub>

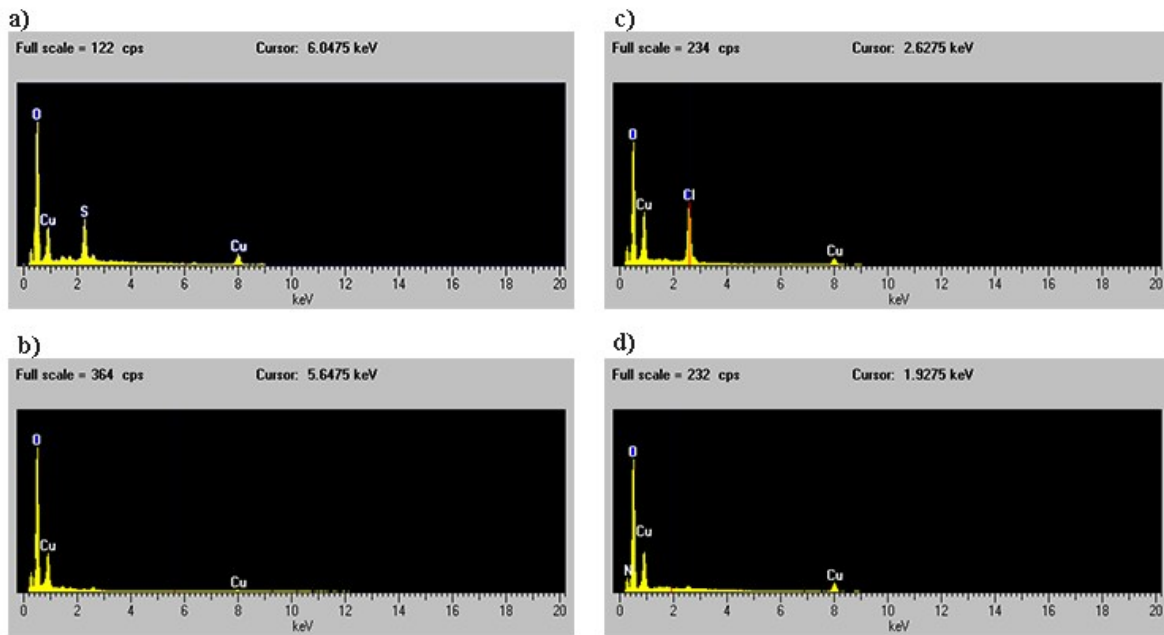

Fig.S2. EDS spectra of the pectin beads surface cross-linked using: a)  $\text{CuSO}_4$ ; b)  $\text{Cu}(\text{CH}_3\text{COO})_2$ ; c)  $\text{Cu}(\text{NO}_3)_2$  and d)  $\text{CuCl}_2$ .

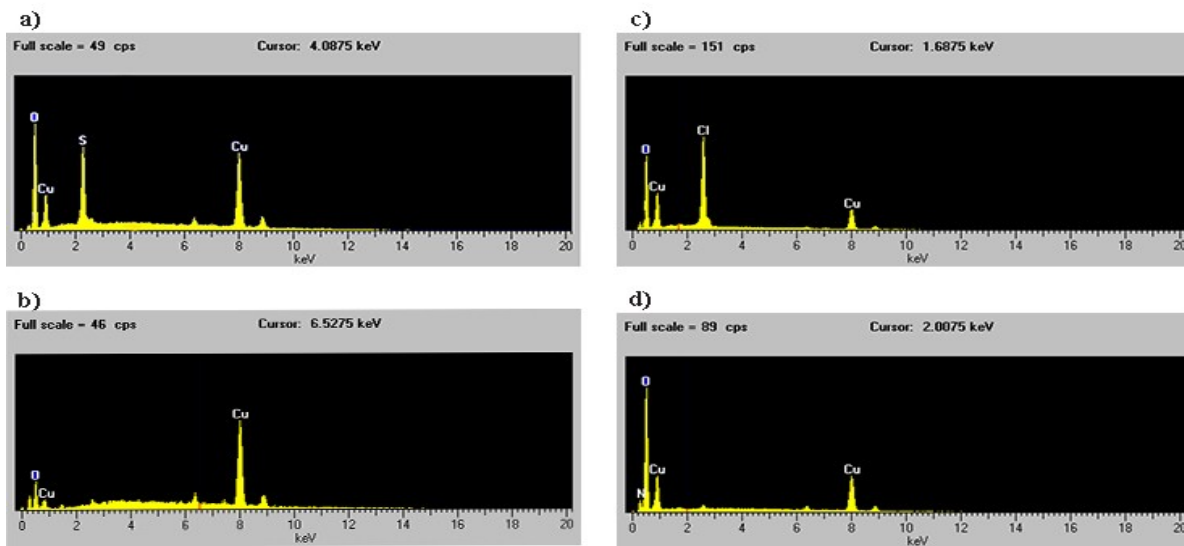

Fig.S3. EDS spectra of interior of the pectin beads cross-linked using: a)  $\text{CuSO}_4$ ; b)  $\text{Cu}(\text{CH}_3\text{COO})_2$ ; c)  $\text{Cu}(\text{NO}_3)_2$  and d)  $\text{CuCl}_2$ .
